# Supplementary material
Source: Springer Nature journal article supplement (https://www.springermedizin.de/resource/supplementary/12874_2012_917_MOESM4_ESM.pdf/9433150)
Supplement: MOESM4 [file 9433150]

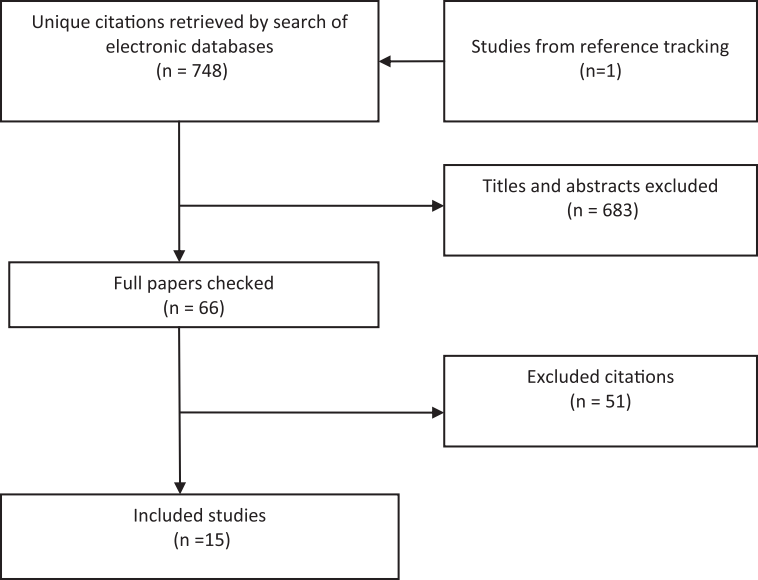

Unique citations retrieved by search of electronic databases  
(n = 748)

Studies from reference tracking  
(n=1)

Titles and abstracts excluded  
(n = 683)

Full papers checked  
(n = 66)

Excluded citations  
(n = 51)

Included studies  
(n =15)
